# Supplementary material for: From Vine to Vintage: NMR Metabolomics of Young and Mature Wine and Grape Ale
Source: Preprints.org preprint supplement (doi:10.20944/preprints202410.1630.v1), 2024-10-22

# From Vine to Vintage: NMR Metabolomics of Young and Mature Wine and Grape Ale

Dessislava Gerginova <sup>1</sup>, Plamen Chorbazhiev <sup>1,2</sup> and Svetlana Simova <sup>1,\*</sup>

<sup>1</sup> Bulgarian NMR Centre, Institute of Organic Chemistry with Centre of Phytochemistry, Bulgarian Academy of Sciences, Acad. G. Bonchev str. Bl. 9, 1113 Sofia, Bulgaria;  
[dessislava.gerginova@orgchm.bas.bg](mailto:dessislava.gerginova@orgchm.bas.bg) (D.G.), [plamen.chorbazhiev@orgchm.bas.bg](mailto:plamen.chorbazhiev@orgchm.bas.bg) (P.C.)

<sup>2</sup> University of Chemical Technology and Metallurgy, 8 St Kliment Okhridski blvd, 1756 Sofia, Bulgaria

\* Correspondence: [svetlana.simova@orgchm.bas.bg](mailto:svetlana.simova@orgchm.bas.bg) (S.S.)

## SUPPORTING INFORMATION

### LIST OF TABLES:

**Table S1a.** Sample abbreviations, grape varieties, vineyards, and years of production for young and mature wines.

**Table S1b.** Manufacturer, aging, grape variety, part of grape used, vintage and country of origin for the grape ale samples measured.

**Table S2.** Misclassification table for the OPLS-DA model assessing the botanical origin of young and mature wines - Merlot, Mavrud, Sauvignon blanc.

### LIST OF FIGURES:

**Figure S1.** Receiver operating characteristic (ROC) curve employed to assess the classification performance of the orthogonal partial least squares-discriminant analysis (OPLS-DA) model in differentiating between grape ales, young wines, and mature wines.

**Figure S2.** Contribution plots illustrating the key compounds that distinguish young and mature wines across three grape varieties (Merlot – light blue and blue, Mavrud – pink and red violet, and Sauvignon blanc – yellow and orange).

**Table S1a.** Sample abbreviations, grape varieties, vineyards, and years of production for young and mature wines.

| Code               | Grape variety   | Origin                                | Year |
|--------------------|-----------------|---------------------------------------|------|
| <b>Mature wine</b> |                 |                                       |      |
| <b>mr_m1</b>       | Merlot          | “Katarzyna” Estate – Mezzek           | 2013 |
| <b>mr_m2</b>       | Merlot          | “Villa Vinifera”                      | 2015 |
| <b>mr_m3</b>       | Merlot          | “Vinprom Karnobat” – Chateau Karnobat | 2015 |
| <b>mv_m1</b>       | Mavrud          | “Villa Vinifera”                      | 2015 |
| <b>mv_m2</b>       | Mavrud          | “Vinzavod” – Mavrud KNP               | 2014 |
| <b>mv-m3</b>       | Mavrud          | Domaine “Menada”                      | 2018 |
| <b>sb_m1</b>       | Sauvignon blanc | Chateau “Burgozone”                   | 2016 |
| <b>sb_m2</b>       | Sauvignon blanc | “Villa Vinifera”                      | 2016 |
| <b>sb_m3</b>       | Sauvignon blanc | “Minkov brothers” – Le Photographe    | 2017 |
| <b>Young wine</b>  |                 |                                       |      |
| <b>mr_y1</b>       | Merlot          | “ Noya” Winery                        | 2023 |
| <b>mr_y2</b>       | Merlot          | “Grandfather Plamen” Winery           | 2023 |
| <b>mr_y3</b>       | Merlot          | Villa “Bassarea”                      | 2023 |
| <b>mv_y1</b>       | Mavrud          | Chateau “Copsa”                       | 2023 |
| <b>mv_y2</b>       | Mavrud          | “Rosalea”                             | 2023 |
| <b>mv-y3</b>       | Mavrud          | “Dimitrovi” Winery                    | 2023 |
| <b>sb_y1</b>       | Sauvignon blanc | “Dzhinvira” Winery                    | 2023 |
| <b>sb_y2</b>       | Sauvignon blanc | Villa “Bassarea”                      | 2023 |
| <b>sb_y3</b>       | Sauvignon blanc | “ DeVina – Vineyards & Wine”          | 2023 |

**Table S1b.** Manufacturer, aging, grape variety, part of grape used, vintage and country of origin for the grape ale samples measured.

|             | <b>Beer name</b>                                                                       | <b>Barrel aged</b> | <b>Grape variety</b>       | <b>Part of grape used</b>    | <b>Vintage</b> | <b>Country of origin</b> |
|-------------|----------------------------------------------------------------------------------------|--------------------|----------------------------|------------------------------|----------------|--------------------------|
| <b>ga_1</b> | MONYO Brewing Co. - Hungarian Terroir: Szekszárd Kékfrankos Barrel Aged Wild Grape Ale | yes                | Kékfrankos (Blaifränkisch) | Grape skins, must, and juice | 2020           | Hungary                  |
| <b>ga_2</b> | MONYO Brewing Co. - Hungarian Terroir: Balatonboglár Sauvignon Blanc                   | yes                | Sauvignon blanc            | Grape skins, must, and juice | 2021           | Hungary                  |
| <b>ga_3</b> | Kykao - Handcrafted - Reverse Engineered Malagouzia                                    | on lees            | Malagouzia                 | Grape skins                  | 2020           | Greece                   |
| <b>ga_4</b> | Kykao - Handcrafted - Kykao × Patraiki Wines - Reverse Engineered Pet Nat              | no                 | Muscat                     | Grape skins                  | 2023           | Greece                   |

**Table S2.** Misclassification table for the OPLS-DA model assessing the botanical origin of young and mature wines - Merlot, Mavrud, Sauvignon blanc.

|                               | Members | Correct | merlot<br>mature | mavrud<br>mature | sauvignon<br>mature | merlot<br>young | mavrud<br>young | sauvignon<br>young |
|-------------------------------|---------|---------|------------------|------------------|---------------------|-----------------|-----------------|--------------------|
| <b>merlot -<br/>mature</b>    | 3       | 100%    | 3                | 0                | 0                   | 0               | 0               | 0                  |
| <b>mavrud -<br/>mature</b>    | 3       | 100%    | 0                | 3                | 0                   | 0               | 0               | 0                  |
| <b>sauvignon<br/>- mature</b> | 3       | 100%    | 0                | 0                | 3                   | 0               | 0               | 0                  |
| <b>merlot -<br/>young</b>     | 3       | 100%    | 0                | 0                | 0                   | 3               | 0               | 0                  |
| <b>mavrud -<br/>young</b>     | 3       | 100%    | 0                | 0                | 0                   | 0               | 3               | 0                  |
| <b>sauvignon<br/>- young</b>  | 3       | 100%    | 0                | 0                | 0                   | 0               | 0               | 3                  |

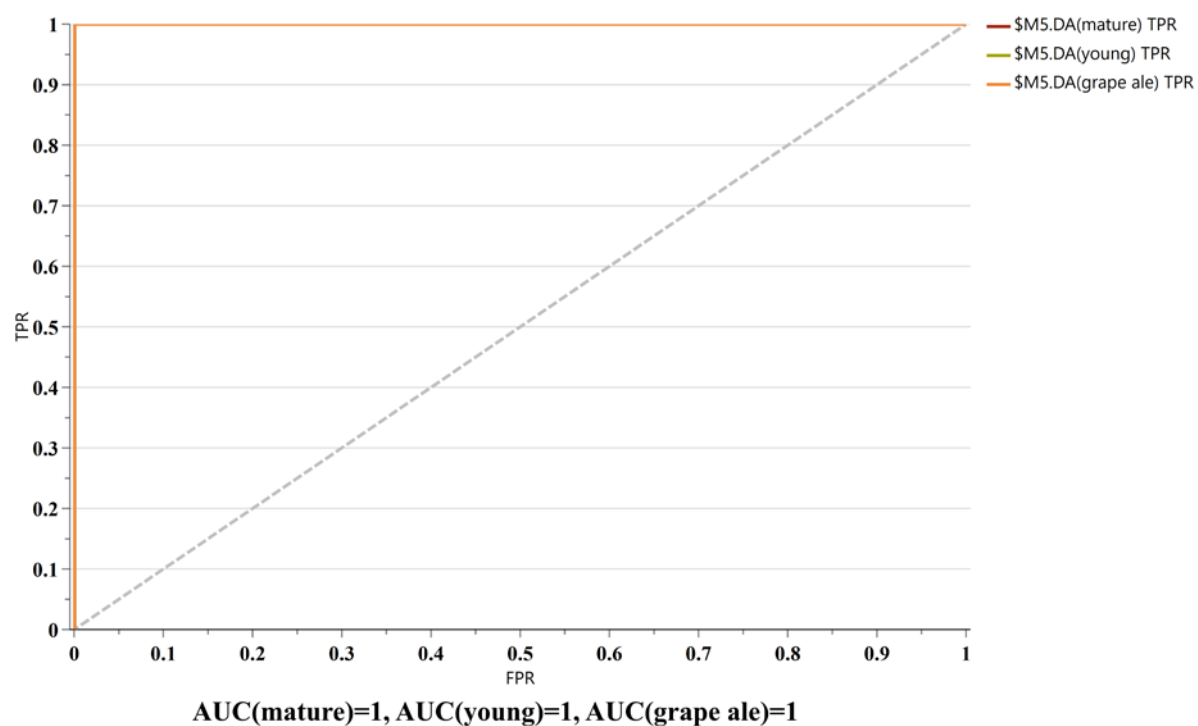

**Figure S1.** Receiver operating characteristic (ROC) curve employed to assess the classification performance of the orthogonal partial least squares-discriminant analysis (OPLS-DA) model in differentiating between grape ales, young wines, and mature wines.

Contribution plots illustrating the key compounds that distinguish young and mature wines across three grape varieties (Merlot – light blue and blue, Mavrud – pink and red violet, and Sauvignon blanc – yellow and orange).

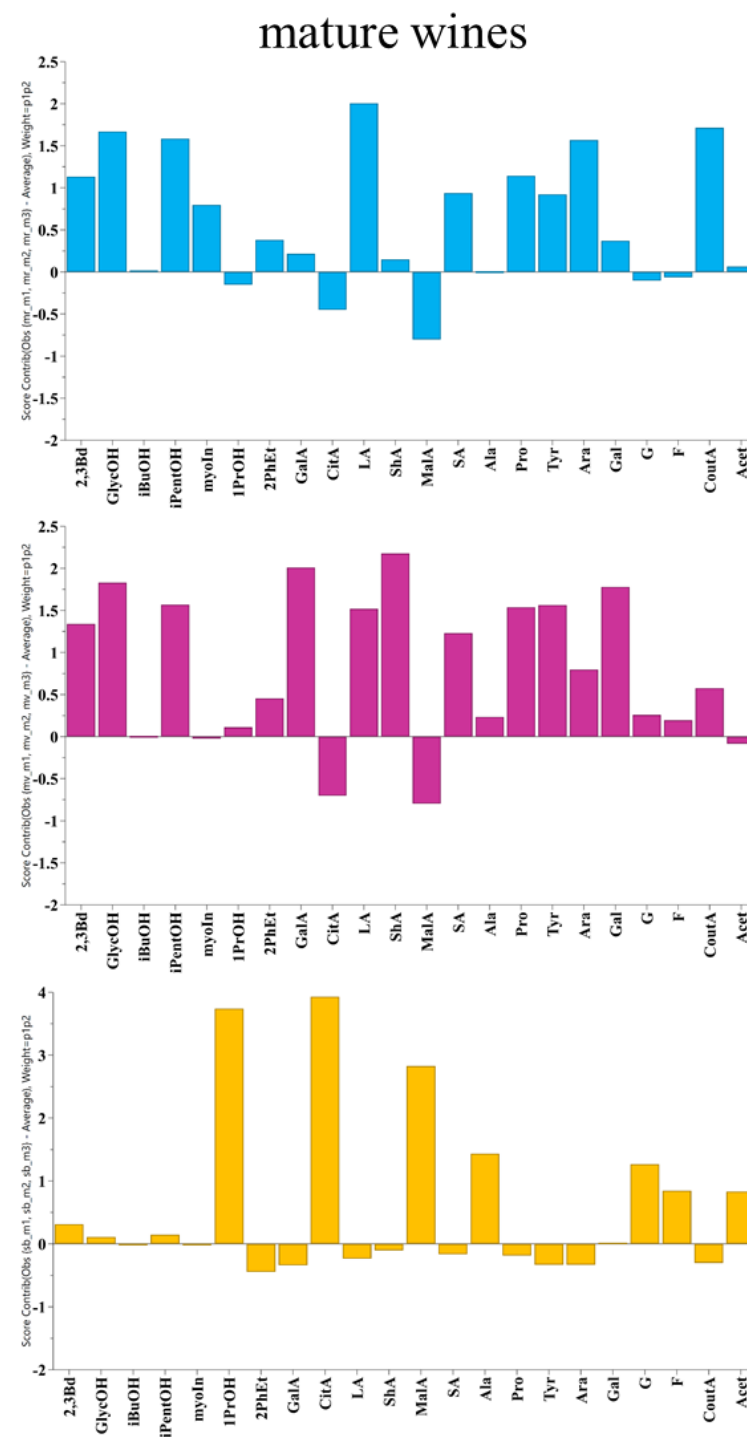

Supplement: Supplementary file 1 [file supplementary]
